# Supplementary material
Source: MDPI journal article supplement (https://www.mdpi.com/2673-3994/4/1/8)
Supplement: s1 [file s1]

### Supplementary Materials

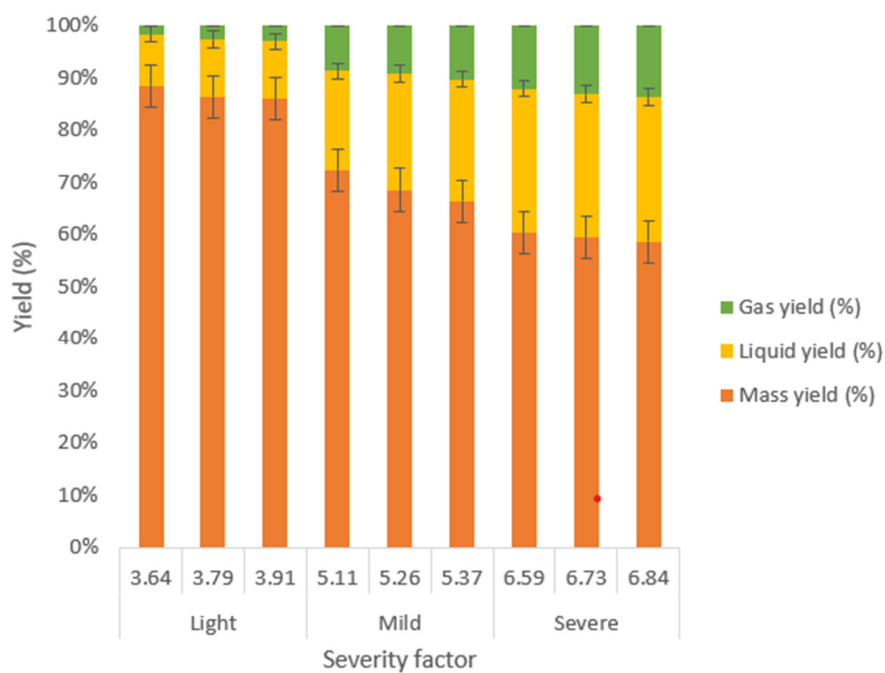

**Figure S1.** Product yields of torrefied white spruce sawdust (WSS).

**Table S1.** Elemental and proximate composition of untreated and torrefied WSS.

| Temp<br>(°C) | RT<br>(min) | SF   | M.C<br>(%) | C<br>(%) | H<br>(%) | N<br>(%) | S<br>(%) | O <sup>a</sup><br>(%) | Ash <sup>b</sup><br>(%) | VM <sup>b</sup><br>(%) | FC <sup>b</sup><br>(%) |
|--------------|-------------|------|------------|----------|----------|----------|----------|-----------------------|-------------------------|------------------------|------------------------|
| NT           | NT          | NT   | 8.69       | 47.47    | 6.66     | 0.11     | 0.21     | 45.41                 | 0.14                    | 86.42                  | 13.44                  |
| 200          | 5           | 3.64 | 8.62       | 48.80    | 5.64     | 0.38     | 0.20     | 44.69                 | 0.29                    | 83.56                  | 16.15                  |
| 200          | 7           | 3.79 | 8.60       | 49.85    | 5.52     | 0.40     | 0.18     | 43.76                 | 0.29                    | 81.22                  | 18.49                  |
| 200          | 9           | 3.91 | 8.55       | 50.17    | 5.48     | 0.40     | 0.15     | 43.50                 | 0.30                    | 79.59                  | 20.11                  |
| 250          | 5           | 5.11 | 8.51       | 50.27    | 5.44     | 0.41     | 0.13     | 43.43                 | 0.32                    | 78.02                  | 21.66                  |
| 250          | 7           | 5.26 | 8.49       | 51.22    | 5.41     | 0.43     | 0.13     | 42.43                 | 0.38                    | 76.50                  | 23.12                  |
| 250          | 9           | 5.37 | 8.41       | 51.87    | 5.39     | 0.43     | 0.15     | 41.74                 | 0.42                    | 75.44                  | 24.14                  |
| 300          | 5           | 6.59 | 8.33       | 52.06    | 5.32     | 0.44     | 0.12     | 41.52                 | 0.54                    | 70.43                  | 29.03                  |
| 300          | 7           | 6.73 | 8.27       | 52.69    | 5.27     | 0.44     | 0.12     | 40.92                 | 0.58                    | 68.89                  | 30.53                  |
| 300          | 9           | 6.84 | 8.24       | 54.25    | 5.22     | 0.44     | 0.11     | 39.34                 | 0.61                    | 67.66                  | 31.73                  |

Temp = temperature; RT = residence time; SF = severity factor (which is a function of temperature and time); M.C = moisture content; C = carbon; H = hydrogen; N = nitrogen; S = sulfur; O = oxygen; VM = volatile matter; FC = fixed carbon; <sup>a</sup>= calculated by difference; <sup>b</sup>= dry basis; and NT = non-treated.

**Table S2.** Pellet properties of torrefied WSS.

| Temp<br>(°C) | RT<br>(min) | SF   | Pellet<br>Density<br>(kg/m <sup>3</sup> ) | Dimensional<br>Stability<br>(%) | Tensile<br>Strength<br>(MPa) |
|--------------|-------------|------|-------------------------------------------|---------------------------------|------------------------------|
| NT           | NT          | NT   | 1048.56                                   | 2.87                            | 1.68                         |
| 200          | 5           | 3.64 | 1022.34                                   | 2.12                            | 1.82                         |
| 200          | 7           | 3.79 | 1017.67                                   | 1.61                            | 1.86                         |
| 200          | 9           | 3.91 | 1001.89                                   | 1.22                            | 1.84                         |
| 250          | 5           | 5.11 | 997.31                                    | 1.06                            | 1.34                         |
| 250          | 7           | 5.26 | 992.00                                    | 0.82                            | 1.26                         |
| 250          | 9           | 5.37 | 973.08                                    | 0.94                            | 1.23                         |
| 300          | 5           | 6.59 | 934.84                                    | 0.67                            | 0.85                         |
| 300          | 7           | 6.73 | 930.61                                    | 0.54                            | 0.81                         |
| 300          | 9           | 6.84 | 915.42                                    | 0.66                            | 0.78                         |

Temp = temperature; RT = residence time; SF = severity factor; NT = untreated.

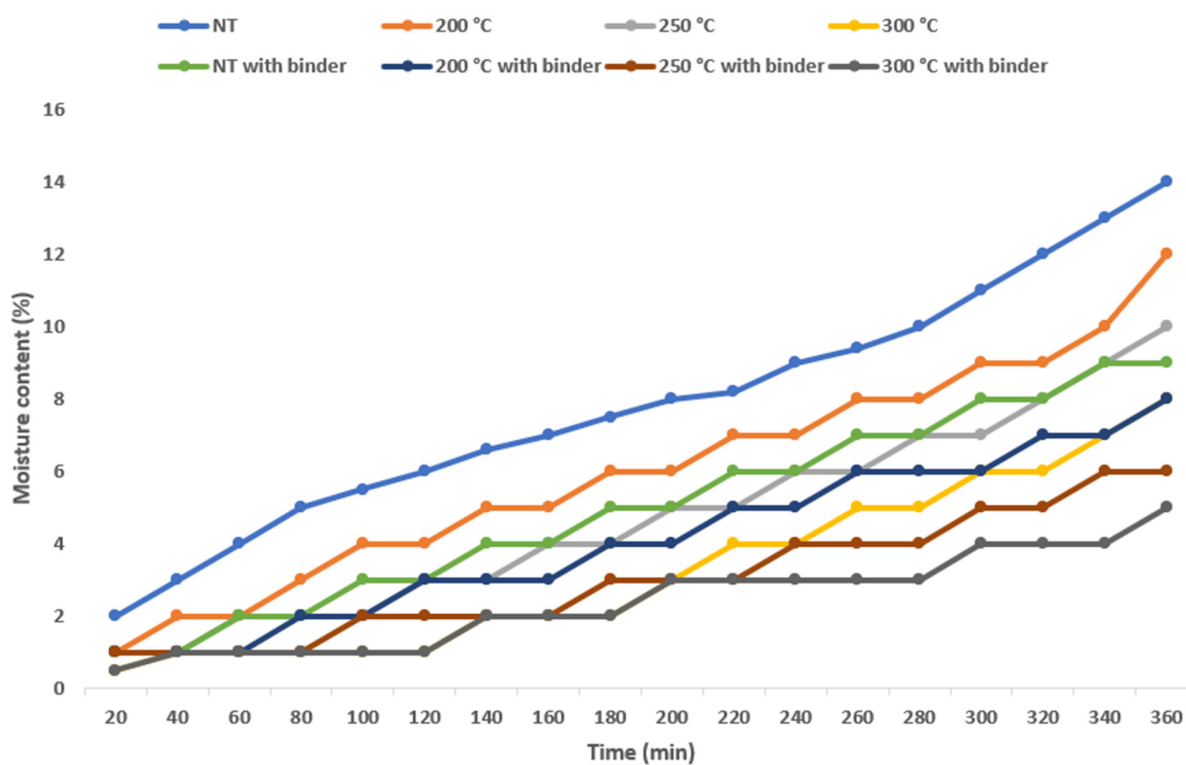

**Figure S2.** Effect of the binders on the moisture absorption rate of the pellets.

NB: NT = Untreated.

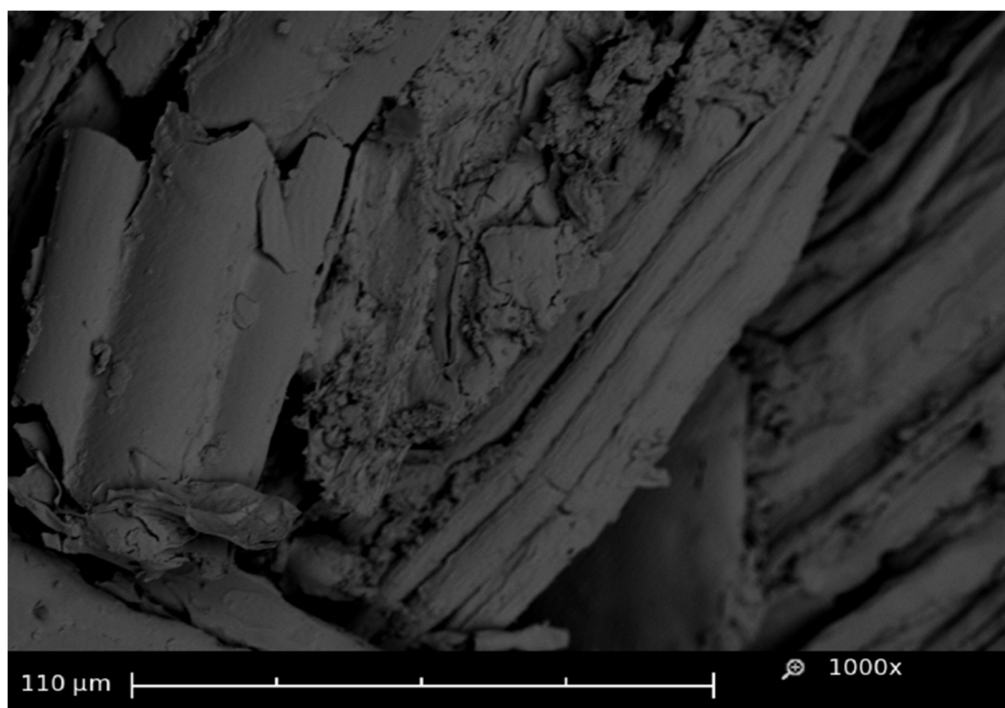

**Figure S3.** Higher magnification of scanning electron microscope image of the longitudinal cross-section of the untreated pellet.

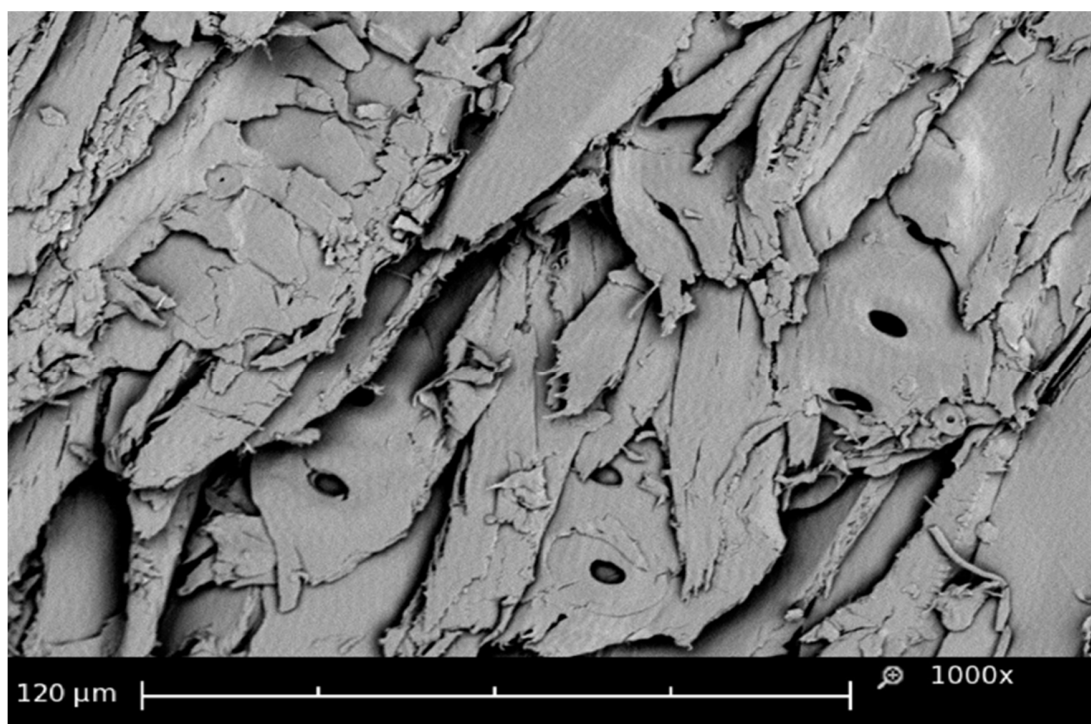

**Figure S4.** Higher magnification of Scanning electron microscope images of the longitudinal cross-section of WSS torrefied at 200 °C.

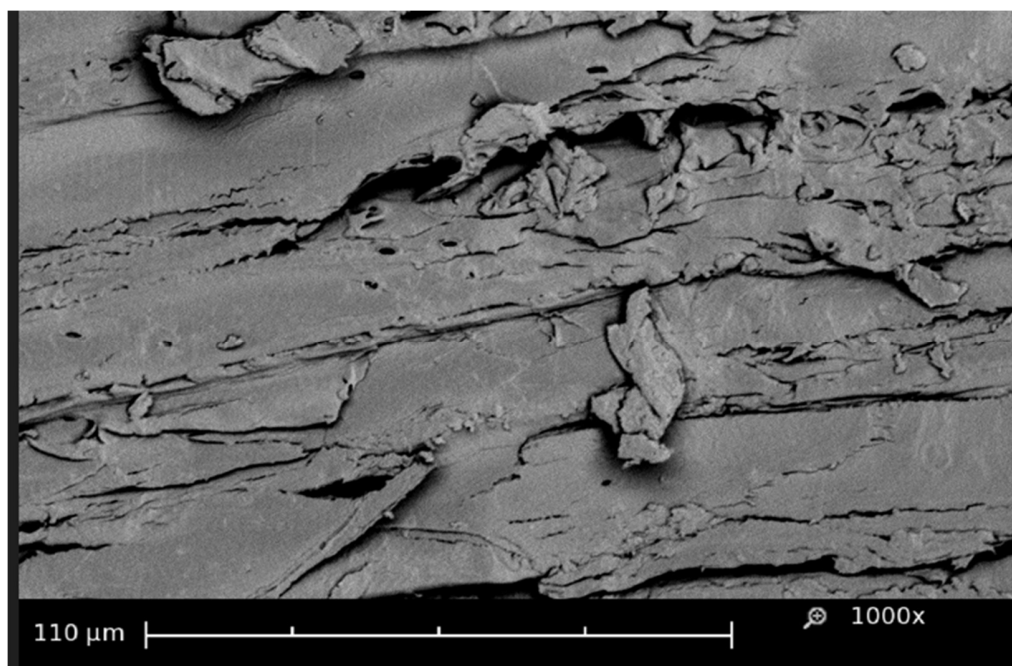

**Figure S5.** Higher magnification of Scanning electron microscope images of the longitudinal cross-section of WSS torrefied at 250 °C.

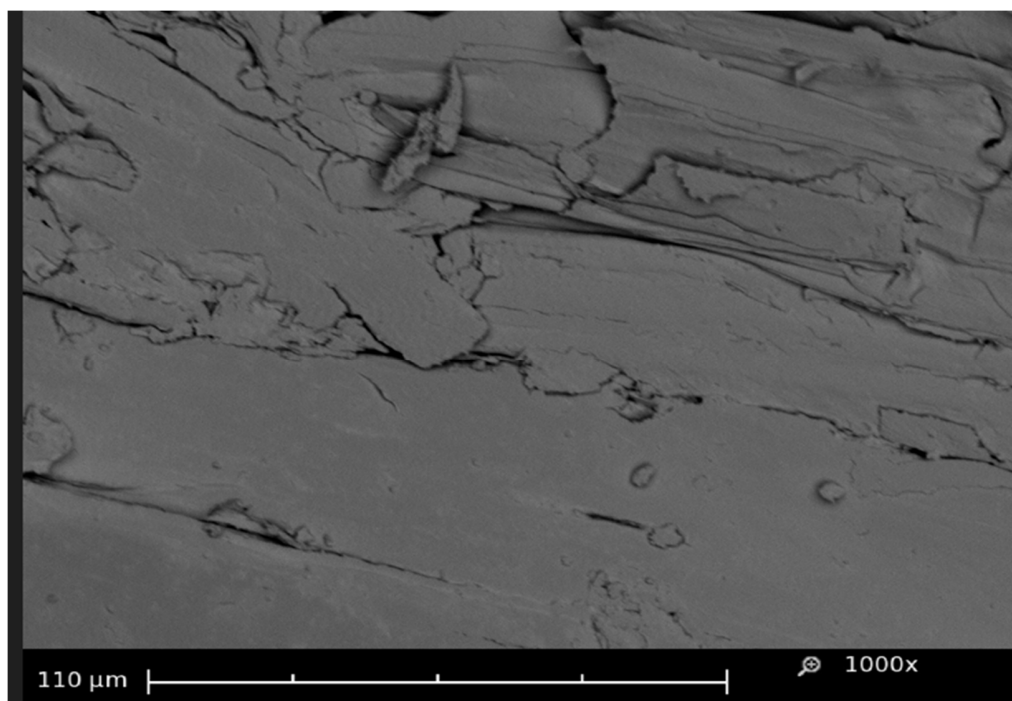

**Figure S6.** Higher magnification of Scanning electron microscope images of the longitudinal cross-section of WSS torrefied at 300 °C.
